# Supplementary material for: Development and validation of diffusive gradients in thin-films for in situ monitoring of ionic liquids in waters
Source: Royal Society of Chemistry journal article supplement (doi:10.1039/d4ay01730g), 2024-01-01
Supplement: d4ay01730g1.pdf [file d4ay01730g1.pdf]

*Supporting Information for*

**Development and Validation of Diffusive Gradients in Thin-Films for  
in Situ Monitoring of Ionic Liquids in Waters**

Si-si Liu<sup>†</sup>, Shi-bao Chen<sup>†</sup>, Yu-bo Yue<sup>†</sup>, Xiao-hao Li<sup>†</sup>, Chi Zhang<sup>‡</sup>, Guang-Guo Ying<sup>†</sup>,  
Chang-Er Chen<sup>†\*</sup>

<sup>†</sup> Environmental Research Institute/School of Environment, Guangdong Provincial Key Laboratory of Chemical Pollution and Environmental Safety & MOE Key Laboratory of Theoretical Chemistry of Environment, South China Normal University, Guangzhou 510006, China.

<sup>‡</sup> Electric Power Research Institute, State Grid Hubei Electric Power Co., Ltd., Wuhan 430000, China

\* To whom correspondence should be addressed:

Email: [changer.chen@m.scnu.edu.cn](mailto:changer.chen@m.scnu.edu.cn), Tel: +86 20 39311529 (CE Chen)

**Number of Pages: 17**

**Number of Tables: 6**

**Number of Figures: 5**

## Contents:

|                                                                                                                                                                                                                                                                   |    |
|-------------------------------------------------------------------------------------------------------------------------------------------------------------------------------------------------------------------------------------------------------------------|----|
| Chemicals, Reagents, and Materials .....                                                                                                                                                                                                                          | 3  |
| Instrumental Analysis.....                                                                                                                                                                                                                                        | 4  |
| MS Conditions .....                                                                                                                                                                                                                                               | 4  |
| Treatment Protocol of Water Samples .....                                                                                                                                                                                                                         | 5  |
| Quality Assurance and Quality Control. ....                                                                                                                                                                                                                       | 6  |
| Table S1. Basic information of target IILs in this study. ....                                                                                                                                                                                                    | 7  |
| Table S2. Characteristics of three candidates for binding resins in this work. ....                                                                                                                                                                               | 8  |
| Table S3. MRM conditions for target compounds.....                                                                                                                                                                                                                | 9  |
| Table S4. Instrument detection limits (IDL) and method detection limits (MDL <sub>DGT</sub> ) of target IILs for DGT samples. ....                                                                                                                                | 10 |
| Table S5. Spiked recoveries and method detection limits (MDL <sub>SPE</sub> ) of target IILs for SPE samples. ....                                                                                                                                                | 11 |
| Table S6. Water quality parameters in the collected river water. ....                                                                                                                                                                                             | 12 |
| Figure S1. Adsorption percentages (%) of target IILs by 6 membrane filters, i.e., polyethenesulfone (PES), polytetrafluoroethylene (PTFE), polyvinylidene difluoride (PVDF), hydrophilic polypropylene (GHP), nylon, and polyacrylamide diffusive gels (PA). .... | 13 |
| Figure S2. Comparison of adsorption of HLB, WCX and MCX gels for target IILs at pH = 6 (A) and pH =9 (B), respectively.. ....                                                                                                                                     | 14 |
| Figure S3. Adsorption capacity of target IILs by MCX gels. ....                                                                                                                                                                                                   | 15 |
| Figure S4. Elution recoveries (%) of target IILs from MCX gels by different elution solvents.....                                                                                                                                                                 | 16 |
| Figure S5. Measured free dissolved concentrations of IILs at different DGT deployment times (0, 1, 2, 3 days) in a 20 L of river water spiked with 400 µg IILs..                                                                                                  | 17 |

### ***Chemicals, Reagents, and Materials***

Target IILs (> 98% purity, Table S1), sodium chloride, hydrochloric acid, formic acid and ammonium hydroxide (3 25% in water) were purchased from Aladdin Reagent Inc. (Shanghai, China). Methanol (HPLC grade) and acetonitrile (HPLC grade) were supplied by Merck (Germany). Sorbents including hydrophobic-lipophilic balance (HLB), mixed-mode cationic exchange (MCX), and weak cationic exchange (WCX) were all purchased from Green Union Science Instrument CO., LTD (Jiangsu, China). The sorbents were copiously washed with MQ water (Elga, France) to remove salts and then conditioned with methanol followed by MQ water before use. DOM isolates (humic acid) were obtained from the International Humic Substance Society (IHSS, <http://www.ihss.gatech.edu>). DGT pistons and gel cross-linker were obtained from Version Environ. Tech. Co. Ltd (Nanjing, China). The filter membranes used were all purchased from Chuang-wei Filtration Equipment Factory (Haining, China).

### ***Instrumental Analysis***

The instrument analysis was performed on an ultra-performance liquid chromatography (UPLC ACUITY, Waters, Milford, MA, USA) coupled to a triple quadrupole tandem mass spectrometer (Xevo TQS, Waters, Milford, MA, USA) equipped with an electrospray ionization interface (ESI) source. An ACUITY UPLC BEH C18 (2.1mm × 50mm, 1.7 mm) column was used. The mobile phases were (A) 0.1% formic acid in MQ water and (B) methanol with a flow speed of 0.3 mL/min. The gradient procedure was optimized at: 0–0.5 min, 10% B, then increase to 100% B within 2.5 min, hold for 1 min, after that decrease to the initial condition (10% B) within 0.1 min. Finally, 0.9 min of post-run ensured re-equilibration of the column before the next injection. The injection volume was 5 µL and the column temperature was set at 40 °C. 1-butyl-2,3-dimethylimidazolium chloride (C5mim) was used as an internal standard for quantification.

### ***MS Conditions***

Ionization: ESI+, Capillary voltage: 3.0 kV; Sampling cone: 40 V; Source offset: 80 V; Source temperature: 120 °C; Desolvation gas temperature: 500 °C; Desolvation gas: 800 L/hr; Cone gas: 150 L/h; Collision gas: 0.17 mL/min; Nebuliser gas: 7 bar. Other MS conditions are summarized in Table S2.

### ***Treatment Protocol of Water Samples***

1000 mL of water samples were collected and pre-filtered through a 0.7  $\mu\text{m}$  GF/F fiber to eliminate the particulate matter. The filtered water samples were then adjusted to  $\text{pH} = 8$  with  $1 \text{ mol}\cdot\text{L}^{-1}$  NaOH. The extraction was performed using CNWBOND MCX SPE cartridges (500 mg, 6 mL) with flow rate of  $2\text{--}3 \text{ mL}\cdot\text{min}^{-1}$  under vacuum. The cartridges were conditioned with 6 mL of methanol and 6 mL of alkaline water ( $\text{pH} = 8$ ). Prior to the elution of the analytes with  $5 \times 2 \text{ mL}$  of 2% formic acid-methanol, the cartridges were washed with 6 mL of 5% ammonium hydroxide and sequentially dried for 120 min. Finally, the extracts were evaporated to near dryness under a gentle stream of nitrogen at  $50 \text{ }^\circ\text{C}$  and reconstituted with 1 mL of initial mobile phases for UPLC-MS/MS analysis. Each sample was extracted in triplicate.

### ***Quality Assurance and Quality Control.***

Instrumental detection limits (IDL) of these IILs were estimated to be 0.02–0.09  $\mu\text{g}\cdot\text{L}^{-1}$  (Table S4), based on the signal/noise ratio (S/N) = 3. Method detection limits for DGT samples ( $\text{MDL}_{\text{DGT}}$ ) were calculated from the IDLs, the concentration factors (CF) and the absolute recovery. For grab samples, the MDLs were calculated as three times the mean absolute standard deviation (SD) of seven replicates at the spiked concentration of 10  $\text{ng L}^{-1}$  ( $n = 7$ ). The MDLs of these IILs ranged from 4  $\text{ng L}^{-1}$  to 29  $\text{ng L}^{-1}$  for DGT samples (Table S4) and from 6.2  $\text{ng L}^{-1}$  to 14  $\text{ng L}^{-1}$  for grab samples (Table S5), respectively. Accuracy and precision of the SPE method were evaluated by treating and analyzing three replicates at the spiked concentration of 25 and 250  $\text{ng L}^{-1}$ , respectively ( $n = 3$ ). Except C2mim and C12mim, the mean spiked recoveries for the other IILs were 82–101% with the relative standard deviations (RSD) less than 19% (Table S5).

Three blank DGT devices were kept throughout the laboratory tests as well as the field applications and analyzed along with the exposed samples. No IIL was detected in any procedural blanks and field blanks. The DGT-measured concentrations presented in this study were all corrected by the corresponding elution efficiencies.

**Table S1.** Basic information of target IILs in this study.

| No. | Compound                                              | CAS Number  | Abbr.  | Formula                                           | MW     | Structure                                                                             |
|-----|-------------------------------------------------------|-------------|--------|---------------------------------------------------|--------|---------------------------------------------------------------------------------------|
| 1   | 1-ethyl-3-methylimidazolium Chloride                  | 65039-09-0  | C2mim  | C <sub>6</sub> H <sub>11</sub> N <sub>2</sub> Cl  | 146.62 |                                                                                       |
| 2   | 1-butyl-3-methylimidazolium chloride                  | 79917-90-1  | C4mim  | C <sub>8</sub> H <sub>15</sub> N <sub>2</sub> Cl  | 174.67 |                                                                                       |
| 3   | 1-hexyl-3-methylimidazolium chloride                  | 171058-17-6 | C6mim  | C <sub>10</sub> H <sub>19</sub> N <sub>2</sub> Cl | 202.72 |    |
| 4   | 1-octyl-3-methylimidazolium chloride                  | 64697-40-1  | C8mim  | C <sub>12</sub> H <sub>23</sub> N <sub>2</sub> Cl | 230.78 |    |
| 5   | 1-decyl-3-methylimidazolium chloride                  | 171058-18-7 | C10mim | C <sub>14</sub> H <sub>27</sub> N <sub>2</sub> Cl | 258.83 |    |
| 6   | 1-dodecyl-3-methylimidazolium chloride                | 114569-84-5 | C12mim | C <sub>16</sub> H <sub>31</sub> N <sub>2</sub> Cl | 286.88 |  |
| 7   | 1-butyl-2,3-dimethylimidazolium chloride <sup>a</sup> | 98892-75-2  | C5mim  | C <sub>9</sub> H <sub>17</sub> N <sub>2</sub> Cl  | 188.70 |                                                                                       |

<sup>a</sup> used as internal standard

**Table S2.** Characteristics of three candidates for binding resins in this work.

| Properties                       | HLB                         | MCX                  | WCX             |
|----------------------------------|-----------------------------|----------------------|-----------------|
| Polymer Type                     | PS-DVB                      | PS-DVB               | PS-DVB          |
| Functionality                    | N-Vinyl-2-pyrrolidone (NVP) | Sulfonic acid        | Carboxylic acid |
| Ionic form                       | H                           | Na                   | No data         |
| Surface area (m <sup>2</sup> /g) | 830                         | 600                  | 500-700         |
| particle size (μm)               | 30                          | 50                   | 40-50           |
| Appearance                       | White powder                | Little yellow powder | White powder    |



**Table S3.** MRM conditions for target compounds

| <b>Compound</b> | <b>Retention time<br/>(min)</b> | <b>Parent ion<br/>(m/z)</b> | <b>Cone Voltage<br/>(V)</b> | <b>Daughter ion<br/>(m/z)</b> | <b>Collision Energy<br/>(eV)</b> |
|-----------------|---------------------------------|-----------------------------|-----------------------------|-------------------------------|----------------------------------|
| C2mim           | 0.51                            | 111.1                       | 26                          | 43.0                          | 18                               |
|                 |                                 |                             |                             | 83.1                          | 5                                |
| C4mim           | 1.04                            | 139.1                       | 14                          | 57.1                          | 16                               |
|                 |                                 |                             |                             | 83.1                          | 5                                |
| C6mim           | 2.07                            | 167.2                       | 40                          | 43.0                          | 16                               |
|                 |                                 |                             |                             | 83.0                          | 18                               |
| C8mim           | 2.64                            | 195.2                       | 40                          | 57.1                          | 20                               |
|                 |                                 |                             |                             | 83.1                          | 18                               |
| C10mim          | 3.05                            | 223.2                       | 46                          | 57.1                          | 30                               |
|                 |                                 |                             |                             | 83.1                          | 24                               |
| C12mim          | 3.39                            | 251.2                       | 38                          | 57.1                          | 30                               |
|                 |                                 |                             |                             | 83.1                          | 24                               |
| C5mim           | 1.33                            | 153.2                       | 26                          | 97.1                          | 20                               |

**Table S4.** Instrument detection limits (IDL) and method detection limits ( $MDL_{DGT}$ ) of target IILs for DGT samples.

| <b>Compound</b> | <b>IDL (ng/mL) <sup>a</sup></b> | <b>Concentration factor (CF) <sup>b</sup></b> | <b><math>MDL_{DGT}</math> (ng/L) <sup>c</sup></b> |
|-----------------|---------------------------------|-----------------------------------------------|---------------------------------------------------|
| C2mim           | 0.05                            | 5.2                                           | 12                                                |
| C4mim           | 0.09                            | 3.0                                           | 29                                                |
| C6mim           | 0.03                            | 4.4                                           | 7                                                 |
| C8mim           | 0.02                            | 4.6                                           | 4                                                 |
| C10mim          | 0.09                            | 4.2                                           | 19                                                |
| C12mim          | 0.02                            | 1.2                                           | 17                                                |

<sup>a</sup> IDL was calculated from the low level of standards with  $S/N > 3$ .

<sup>b</sup>  $CF = \frac{D_e At}{V \Delta g}$ , where  $V$  is the volume of eluent (10 mL) after 7-day deployment in the laboratory under 25 °C.

<sup>c</sup>  $MDL_{DGT} = \frac{IDL}{R \cdot CF}$ , where  $R$  is the absolute recovery for DGT samples.

**Table S5.** Spiked recoveries and method detection limits ( $MDL_{SPE}$ ) of target IILs for SPE samples.

| Compound | Recovery, % (mean $\pm$ SD, $n = 3$ ) |                 | $MDL_{SPE}$ (ng/L) <sup>a</sup> |
|----------|---------------------------------------|-----------------|---------------------------------|
|          | Spiked 25 ng/L                        | Spiked 250 ng/L |                                 |
| C2mim    | 62 $\pm$ 1.4                          | 34 $\pm$ 1.5    | 13                              |
| C4mim    | 83 $\pm$ 9.4                          | 82 $\pm$ 7.0    | 6.5                             |
| C6mim    | 94 $\pm$ 15                           | 93 $\pm$ 2.5    | 8.2                             |
| C8mim    | 91 $\pm$ 11                           | 101 $\pm$ 5.6   | 6.2                             |
| C10mim   | 91 $\pm$ 19                           | 98 $\pm$ 5.4    | 11                              |
| C12mim   | 57 $\pm$ 9.7                          | 35 $\pm$ 7.8    | 14                              |

<sup>a</sup>  $MDL_{SPE} = 3.14 \times SD$ , where SD is the mean absolute standard deviation of the seven spiked replicates at the concentration level of 10 ng/L ( $n = 7$ ).

**Table S6.** Water quality parameters in the collected river water.

|                | <i>DOC</i><br>(mg/L) | <i>DO</i><br>(mg/L) | pH  | <i>ORP</i> (mV) | $\sigma$<br>( $\mu$ S/cm) | Temperature<br>( $^{\circ}$ C) |
|----------------|----------------------|---------------------|-----|-----------------|---------------------------|--------------------------------|
| River<br>water | 8.134                | 2.01                | 7.8 | 139.7           | 228.1                     | 25.2 $\pm$ 0.3                 |

*DO*: Dissolved Oxygen.

*ORP*: Oxidation-Reduction Potential.

$\sigma$ : Conductivity.

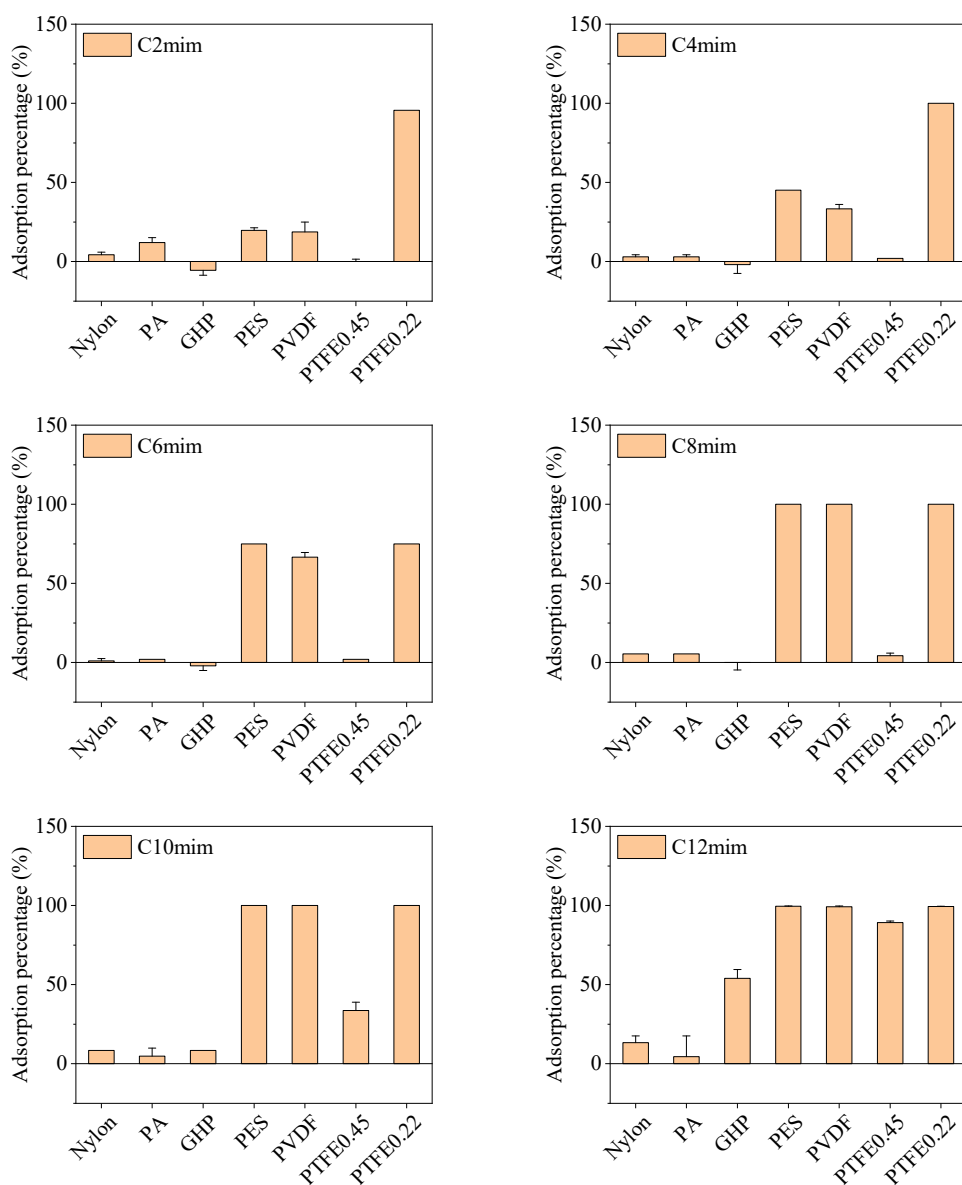

**Figure S1.** Adsorption percentages (%) of target IILs by 6 membrane filters, i.e., polyethenesulfone (PES), polytetrafluoroethylene (PTFE), polyvinylidene difluoride (PVDF), hydrophilic polypropylene (GHP), nylon, and polyacrylamide diffusive gels (PA). PTFE membranes with different pore sizes (0.22 and 0.45  $\mu\text{m}$ ) were test. Other membrane filters used had a 0.45  $\mu\text{m}$  pore diameter. Error bars represent 1 standard deviation (SD,  $n = 3$ ).

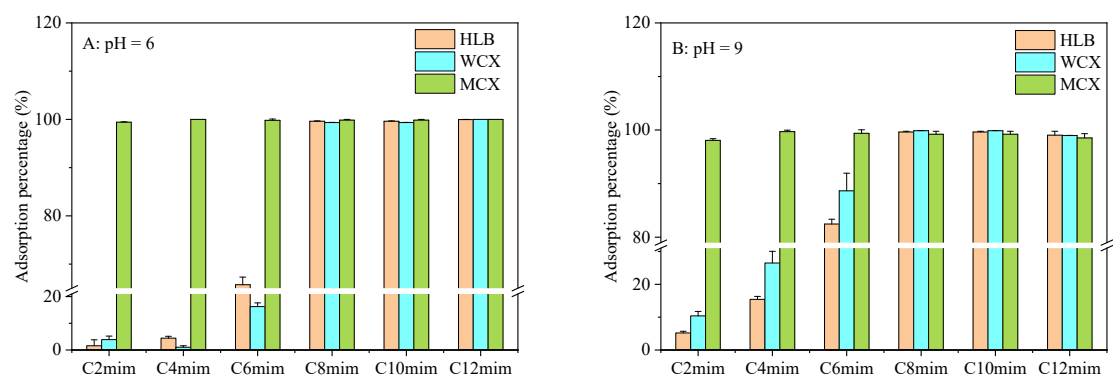

**Figure S2.** Comparison of adsorption of HLB, WCX and MCX gels for target IILs at pH = 6 (A) and pH =9 (B), respectively. The ionic strength was maintained at 0.01 mol/L NaCl. Error bars represent 1 standard deviation (SD,  $n = 3$ ).

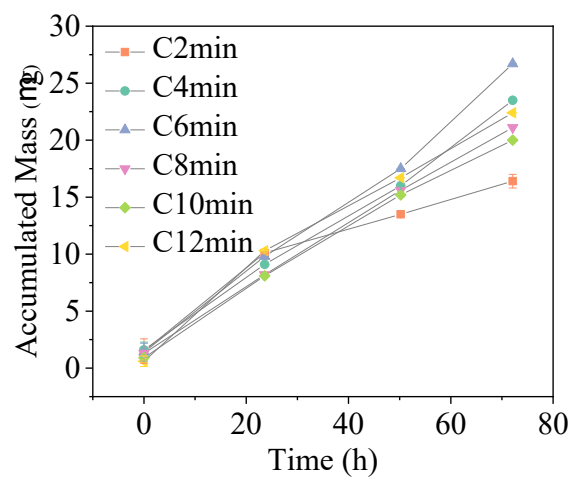

**Figure S3.** Adsorption capacity of target IILs by MCX gels. The ionic strength was maintained at 0.01 mol/L NaCl. Error bars represent 1 standard deviation (SD,  $n = 3$ ).

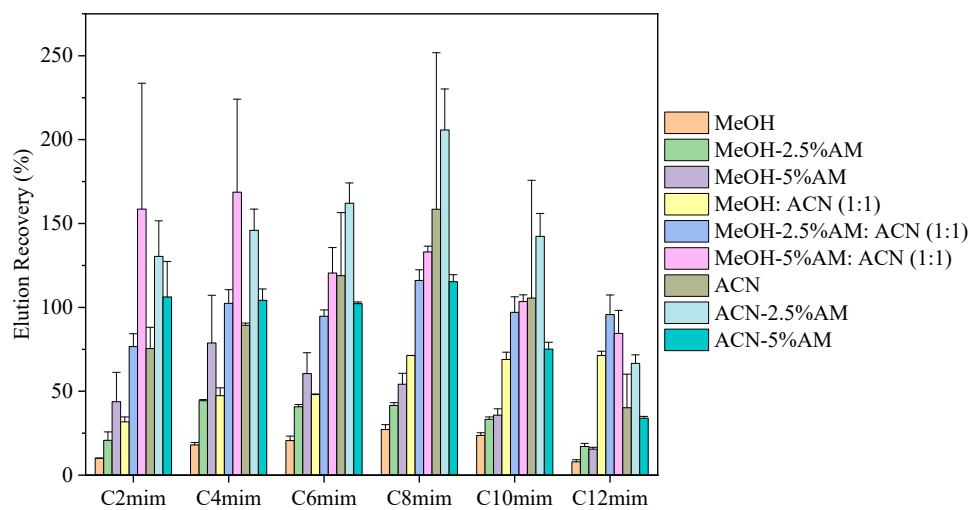

**Figure S4.** Elution recoveries (%) of target IILs from MCX gels by different elution solvents. Error bars represent 1 standard deviation (SD,  $n = 3$ ). MeOH: methanol; ACN: acetonitrile; AM: ammonium hydroxide.



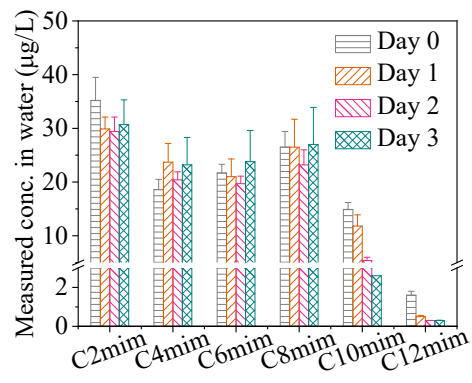

**Figure S5.** Measured free dissolved concentrations of IILs at different DGT deployment times (0, 1, 2, 3 days) in a 20 L of river water spiked with 400 µg IILs. Error bars represent 1 standard deviation (SD,  $n = 3$ ).
